# Supplementary material for: CRISPR/Cas9-mediated reversibly immortalized mouse bone marrow stromal stem cells (BMSCs) retain multipotent features of mesenchymal stem cells (MSCs)
Source: PubMed Central journal article supplement (PMC5762364; doi:10.18632/oncotarget.22915), 2017-12-05
Supplement: oncotarget-08-111847-s001.pdf [file oncotarget-08-111847-s001.pdf]

## **CRISPR/Cas9-mediated reversibly immortalized mouse bone marrow stromal stem cells (BMSCs) retain multipotent features of mesenchymal stem cells (MSCs)**

### **SUPPLEMENTARY MATERIALS**

**Supplementary Table 1: List of PCR and Cloning Primers**

**See Supplementary File 1**
